# Supplementary material for: High-dimensional and spatial analysis reveals immune landscape dependent progression in cutaneous squamous cell carcinoma
Source: bioRxiv or medRxiv preprint supplement (doi:10.1101/2022.04.19.488697), 2022-04-19

| <b>Metal tag</b> | <b>Target</b>    | <b>Antibody Clone</b> | <b>Company</b>       | <b>Catalogue number</b> |
|------------------|------------------|-----------------------|----------------------|-------------------------|
| <b>139La</b>     | pan-Cytokeratin  | SPM115, SPM116        | Novus biologicals    | NOVNBP234               |
| <b>141Pr</b>     | CD20             | H1                    | BD                   | 555677                  |
| <b>142Nd</b>     | Histone H3       | Polyclonal            | Novus biologicals    | NOVNB500171             |
| <b>143Nd</b>     | CD45RA           | HI100                 | Biologend            | 304102                  |
| <b>146Nd</b>     | CD8a             | D8A8Y                 | Cell signalling      | 85336BF                 |
| <b>147Sm</b>     | Podoplanin       | Polyclonal            | RnD Systems          | RDSAF367                |
| <b>148Nd</b>     | CD16             | EPR16784              | abcam                | Ab256582                |
| <b>149Sm</b>     | CADM1            | Polyclonal            | Invitrogen           | PA524196                |
| <b>150Nd</b>     | IDO              | D5J4E                 | CST                  | 86630S                  |
| <b>151Eu</b>     | PDL1             | E13LN                 | CST                  | 13684S                  |
| <b>152Sm</b>     | CD13             | 498001                | RnD Systems          | MAB3815                 |
| <b>153Eu</b>     | CD68             | KP1                   | Biologend            | 916104                  |
| <b>154Sm</b>     | VISTA            | D1L2G                 | CST                  | 64953S                  |
| <b>155Gd</b>     | CD31             | EPR3094               | abcam                | Ab207090                |
| <b>156Gd</b>     | CXCR3            | 49801                 | abcam                | ab64714                 |
| <b>158Gd</b>     | pSTAT3           | 4/P-STAT3             | Fluidigm             | 3158030D                |
| <b>159Tb</b>     | CCR7             | Polyclonal            | Proteintech          | 55425-1-AP              |
| <b>160Gd</b>     | CD14             | EPR3653               | abcam                | Ab214438                |
| <b>161Dy</b>     | FXIIIa           | Polyclonal            | Affinity Biologicals | SAF13A-AP               |
| <b>162Dy</b>     | FoxP3            | Polyclonal            | RnD Systems          | RDSAF3240               |
| <b>163Dy</b>     | PD1              | EPR4877(2)            | abcam                | Ab186928                |
| <b>164Dy</b>     | CD45RO           | UCHL1                 | Becton Dickinson     | 555491                  |
| <b>165Ho</b>     | OX40             | E9U70                 | CST                  | 61637S                  |
| <b>166Er</b>     | NFKB p65 subunit | K10x                  | Fluidigm             | 3166026D                |
| <b>167Er</b>     | CD66a            | YTH71.3               | abcam                | Ab128720                |
| <b>168Er</b>     | Ki67             | Polyclonal            | R&D systems          | RDSAF7617               |
| <b>169Tm</b>     | Lag3             | D2G40                 | CST                  | 15372                   |
| <b>170Er</b>     | CD3              | Polyclonal            | abcam                | AB5690                  |
| <b>171Yb</b>     | Granzyme B       | EPR8260               | abcam                | Ab226162                |
| <b>172Yb</b>     | PDL2             | D7U8C                 | Fluidigm             | 3172031D                |
| <b>173Yb</b>     | CD4              | EPR6855               | abcam                | AB181724                |
| <b>174Yb</b>     | HLA DR           | EPR3692               | abcam                | AB215985                |
| <b>175Lu</b>     | ICOS             | D1K2T                 | CST                  | 89601S                  |
| <b>176Yb</b>     | TIM3             | D5D5R                 | CST                  | 45208S                  |
| <b>191Ir</b>     | DNA intercalator | -                     | Fluidigm             | 201192B                 |
| <b>193Ir</b>     | DNA intercalator | -                     | Fluidigm             | 201192B                 |

Supplementary Figure 1

**A I CD8+ Tcells**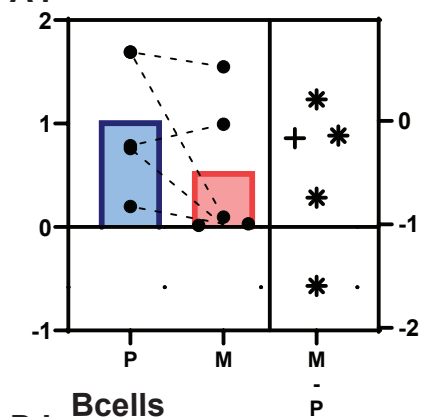**A II**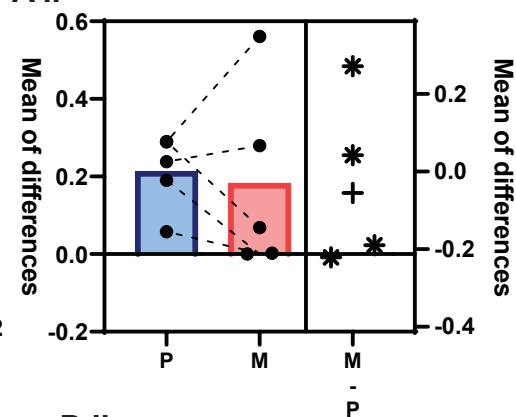**B I CD4+ Tcells**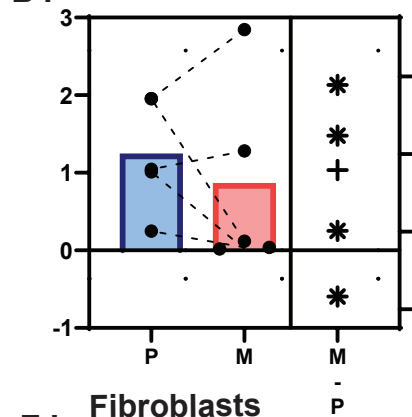**B II**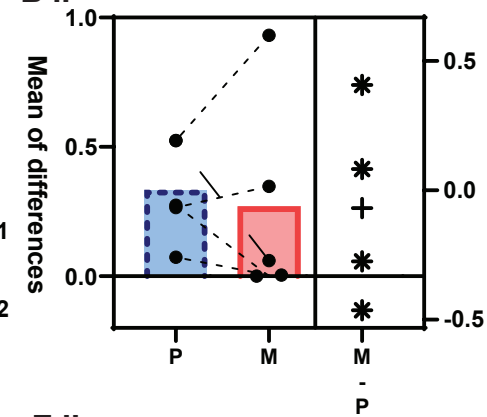**C Tregs**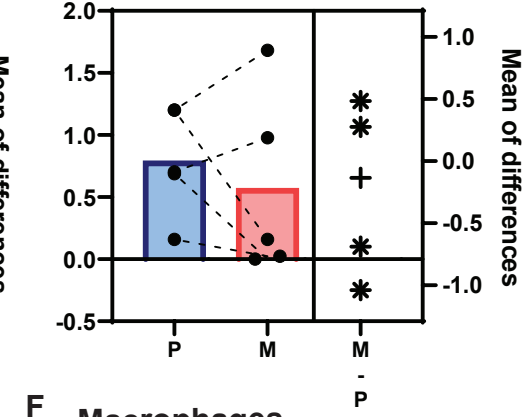**D I Bcells**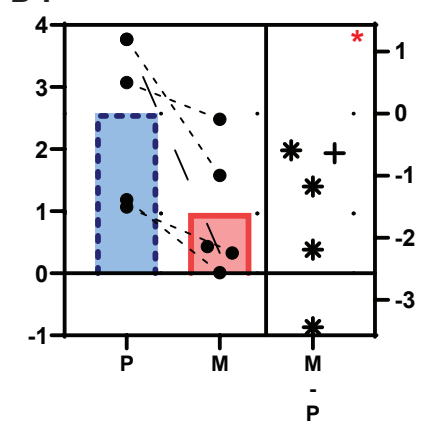**D II**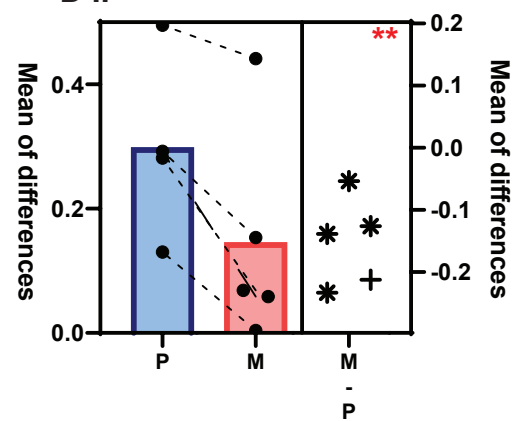**E I Fibroblasts**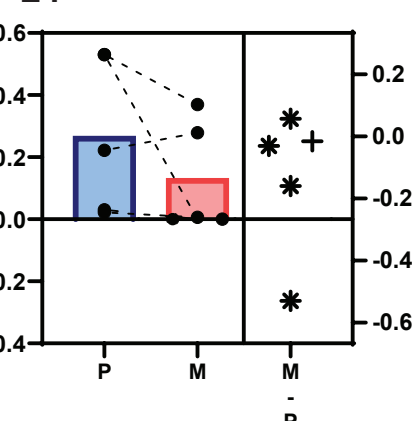**E II**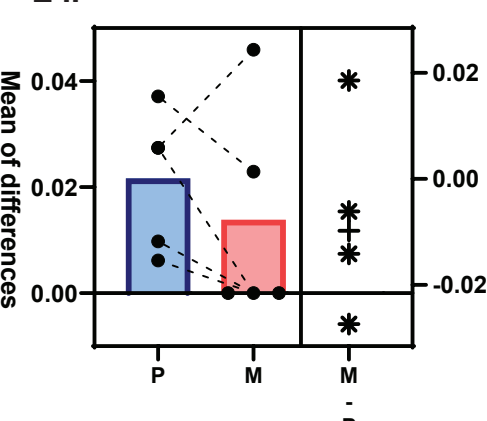**F Macrophages**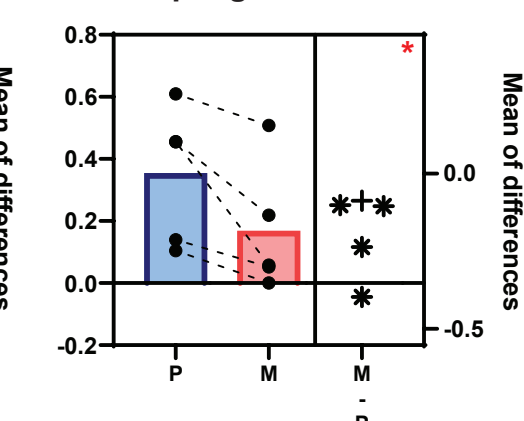**G monocytes**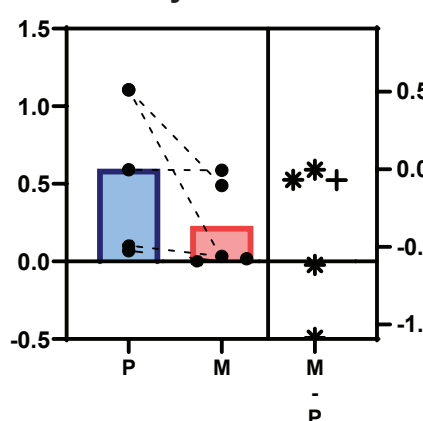**H non-classical monocytes**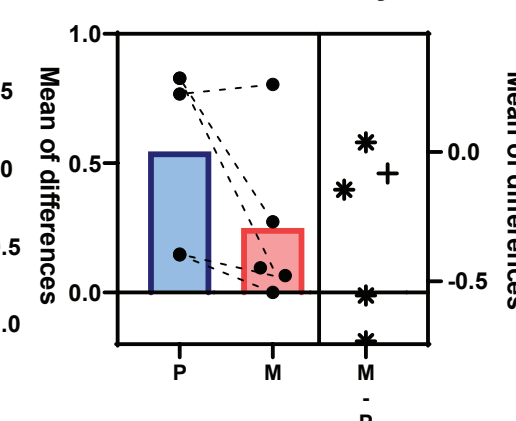**I Neutrophils**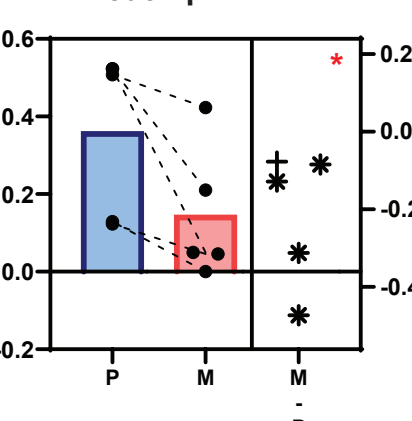**J non-neutrophil granulocytes**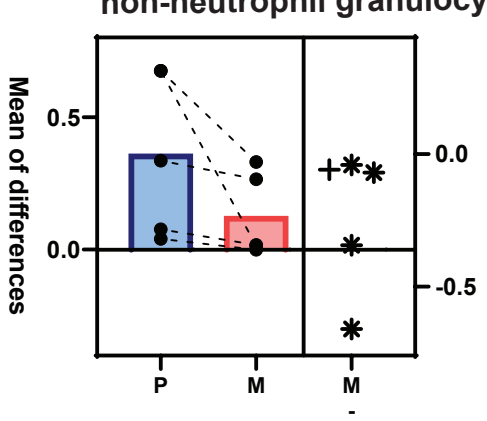

Supplement: Supplementary file [file media-1.pdf]
